# Supplementary material for: Comparison of the Impact of Ship Emissions in Northern Europe and Eastern China
Source: MDPI journal article supplement (doi:10.3390/atmos13060894), 2022-05-31
Supplement: s1 [file s1]

# Supplementary Materials:

Daniel A. Schwarzkopf \*, Ronny Petrik, Volker Matthias, Markus Quante, Guangyuan Yu and Yan Zhang

\* **Correspondence:** Correspondence: daniel.schwarzkopf@hereon.de

## 1. Mapping for MEIC to SNAP Sectors and EDGAR Activity Codes 1

The mapping of sectors present in the MEIC emission inventory for China to SNAP sectors and EDGAR activity codes is shown in Table S1. The mapping to SNAP sectors was used to apply the vertical emission profile developed by TNO to the MEIC inventory. The mapping to EDGAR activity codes was used to apply the country and sector specific high resolution temporal profiles developed by Crippa et al. [2020] to the MEIC inventory and generate hourly resolved emission data.

**Table S1.** Mapping of MEIC emission inventory sectors to SNAP sectors and EDGAR Activity Codes.

| MEIC sector    | SNAP sector           | EDGAR activity codes                                                                                                                                                                                                                                                                                                                                                                                                                                                                     |
|----------------|-----------------------|------------------------------------------------------------------------------------------------------------------------------------------------------------------------------------------------------------------------------------------------------------------------------------------------------------------------------------------------------------------------------------------------------------------------------------------------------------------------------------------|
| Agriculture    | L_AgriOther           | AGS (agricultural soils),<br>AWB (agricultural waste<br>burning), ENF (enteric<br>fermentation), MNM (manure<br>management) data                                                                                                                                                                                                                                                                                                                                                         |
|                |                       | CHE (production of<br>chemicals), FOO (production<br>of foods), IND<br>(manufacturing industry),<br>IRO (production of iron and<br>steel), NFE (production of<br>non-ferrous metals), NMM<br>(production of non-metallic<br>minerals), PAP (production<br>of pulp and paper), PRO (fuel<br>production/transmission),<br>PRU (production, use of<br>products), REF (oil<br>refineries), SOL (application<br>of solvents), SWD (solid<br>waste disposal), TRF<br>(transformation industry) |
| Industry       | B_Industry            | ENE (power industry)<br>RCO (residential)<br>TNR (non-road<br>transportation), TRO (road<br>transportation)                                                                                                                                                                                                                                                                                                                                                                              |
| Power          | A_PublicPower         |                                                                                                                                                                                                                                                                                                                                                                                                                                                                                          |
| Residential    | C_OtherStationaryComb |                                                                                                                                                                                                                                                                                                                                                                                                                                                                                          |
| Transportation | F_RoadTransport       |                                                                                                                                                                                                                                                                                                                                                                                                                                                                                          |

## 2. Model Performance Data 8

Following, the comparison data of the modeled “base” case, that includes all emission sources, and the “no ships” case, that omits ships, with measurements is shown in Tables S2 to S9. For each pollutant and station the geometric mean, the normalized mean bias (NMB) and the Spearman correlation coefficient was calculated. Furthermore, the number of available hourly measurements is shown.

**Table S2.** Comparison of modeled NO<sub>2</sub> concentrations in  $\mu\text{g}\cdot\text{m}^{-3}$  with measurements in Europe.

| Station          | Meanbase | NMBbase | Corr.base | Meannosh | NMBnosh | Corr.nosh | Meanmeas | No. samples |
|------------------|----------|---------|-----------|----------|---------|-----------|----------|-------------|
| Dublin           | 3.05     | −0.38   | 0.62      | 2.70     | −0.47   | 0.63      | 4.94     | 8618        |
| Blackpool        | 2.47     | −0.63   | 0.69      | 1.83     | −0.67   | 0.70      | 11.46    | 8343        |
| Narberth         | 1.60     | −0.14   | 0.53      | 1.10     | −0.35   | 0.54      | 1.63     | 8572        |
| Plymouth         | 2.27     | −0.81   | 0.58      | 1.00     | −0.90   | 0.60      | 13.53    | 8650        |
| Brighton         | 4.77     | −0.53   | 0.67      | 2.71     | −0.67   | 0.63      | 10.72    | 8619        |
| Lullington Heath | 4.44     | −0.09   | 0.66      | 1.91     | −0.44   | 0.60      | 4.79     | 5834        |
| Newcastle        | 6.06     | −0.69   | 0.59      | 4.39     | −0.76   | 0.61      | 25.56    | 8341        |
| Houtem           | 7.19     | −0.01   | 0.64      | 4.36     | −0.35   | 0.63      | 7.12     | 8186        |
| Gent             | 13.51    | −0.29   | 0.63      | 7.05     | −0.61   | 0.66      | 23.40    | 8022        |
| Schoten          | 17.79    | −0.05   | 0.63      | 10.18    | −0.43   | 0.65      | 21.26    | 8388        |
| Den Haag         | 17.91    | −0.03   | 0.70      | 8.47     | −0.51   | 0.66      | 22.20    | 8653        |
| De Zilk          | 12.99    | 0.40    | 0.70      | 7.02     | −0.19   | 0.66      | 9.83     | 8565        |
| Wieringerwerf    | 5.30     | −0.27   | 0.78      | 2.35     | −0.62   | 0.75      | 8.55     | 8714        |
| Ostfr. Inseln    | 3.43     | −0.39   | 0.75      | 1.01     | −0.68   | 0.75      | 6.39     | 8347        |
| Elbmündung       | 5.33     | −0.37   | 0.64      | 1.70     | −0.72   | 0.62      | 9.56     | 8415        |
| Hamburg          | 12.12    | −0.45   | 0.51      | 5.49     | −0.73   | 0.50      | 26.39    | 8727        |
| Westerland       | 1.34     | −0.55   | 0.79      | 0.51     | −0.77   | 0.77      | 2.17     | 8287        |
| Ulborg           | 1.54     | −0.43   | 0.69      | 0.86     | −0.62   | 0.66      | 2.77     | 7691        |
| Århus            | 3.23     | −0.67   | 0.61      | 1.61     | −0.83   | 0.50      | 9.61     | 7962        |
| Copenhagen       | 7.13     | −0.36   | 0.51      | 4.71     | −0.53   | 0.46      | 12.32    | 7965        |
| Zingst           | 2.95     | −0.19   | 0.71      | 1.04     | −0.60   | 0.60      | 3.73     | 8216        |
| Gdansk           | 5.80     | −0.41   | 0.58      | 3.21     | −0.63   | 0.63      | 10.44    | 8353        |
| Nowy Port        | 0.98     | −0.42   | 0.62      | 0.35     | −0.73   | 0.38      | 1.37     | 8444        |
| Vilsandi         | 1.16     | −0.47   | 0.59      | 0.26     | −0.85   | 0.33      | 2.25     | 8633        |
| Õismäe           | 3.65     | −0.42   | 0.52      | 1.23     | −0.78   | 0.57      | 5.13     | 8603        |
| Helsinki         | 5.90     | −0.48   | 0.45      | 4.35     | −0.60   | 0.41      | 14.01    | 8725        |
| Kallio           | 1.33     | −0.18   | 0.49      | 0.80     | −0.46   | 0.45      | 1.61     | 8644        |
| Lahemaa          | 1.56     | −0.36   | 0.53      | 0.88     | −0.62   | 0.38      | 2.74     | 8601        |
| Pyykösjärvi      | 3.00     | −0.55   | 0.48      | 2.91     | −0.55   | 0.47      | 6.61     | 8728        |

**Table S3.** Comparison of modeled SO<sub>2</sub> concentrations in  $\mu\text{g}\cdot\text{m}^{-3}$  with measurements in Europe.

| Station          | Meanbase | NMBbase | Corr.base | Meannosh | NMBnosh | Corr.nosh | Meanmeas | No. samples |
|------------------|----------|---------|-----------|----------|---------|-----------|----------|-------------|
| Narberth         | 0.37     | 0.04    | −0.05     | 0.19     | −0.12   | −0.01     | 0.68     | 8367        |
| Lullington Heath | 0.28     | −0.40   | 0.08      | 0.18     | −0.46   | 0.08      | 0.95     | 8266        |
| Houtem           | 1.19     | 1.20    | 0.19      | 1.08     | 1.13    | 0.19      | 1.07     | 8408        |
| Gent             | 0.94     | 0.64    | 0.37      | 0.73     | 0.51    | 0.37      | 1.23     | 8335        |
| De Zilk          | 0.73     | 0.22    | 0.32      | 0.54     | 0.10    | 0.32      | 0.95     | 7298        |
| Ostfr. Inseln    | 0.14     | 0.12    | 0.35      | 0.08     | 0.03    | 0.35      | 0.40     | 6422        |
| Hamburg          | 1.07     | −0.50   | 0.29      | 0.83     | −0.55   | 0.30      | 3.28     | 8727        |
| Westerland       | 0.09     | 0.71    | 0.09      | 0.05     | 0.58    | 0.08      | 0.26     | 8315        |
| Zingst           | 0.21     | 0.36    | 0.55      | 0.14     | 0.29    | 0.54      | 0.39     | 7830        |
| Gdansk           | 1.67     | −0.04   | 0.44      | 1.59     | −0.06   | 0.44      | 2.17     | 8690        |
| Nowy Port        |          |         |           |          |         |           |          |             |

|           |      |       |      |      |       |      |      |      |
|-----------|------|-------|------|------|-------|------|------|------|
| Vilsandi  | 0.11 | -0.03 | 0.37 | 0.07 | -0.08 | 0.38 | 0.27 | 6862 |
| Utö       | 0.10 | -0.32 | 0.49 | 0.05 | -0.38 | 0.51 | 0.30 | 8707 |
| Õismäe    | 0.39 | 0.03  | 0.27 | 0.32 | -0.05 | 0.26 | 0.47 | 7818 |
| Helsinki  | 1.00 | 0.11  | 0.16 | 0.95 | 0.08  | 0.16 | 0.61 | 7491 |
| Kallio    |      |       |      |      |       |      |      |      |
| Lahemaa   | 0.23 | -0.31 | 0.15 | 0.19 | -0.33 | 0.15 | 0.53 | 8079 |
| Virolahti | 0.26 | 0.24  | 0.41 | 0.23 | 0.19  | 0.41 | 0.21 | 8590 |

**Table S4.** Comparison of modeled O<sub>3</sub> 8-hour mean concentrations in  $\mu\text{g} \cdot \text{m}^{-3}$  with measurements in Europe.

| Station       | Meanbase | NMBbase | Corr.base | Meannoships | NMBnoships | Corr.noships | Meanmeas | No. samples |
|---------------|----------|---------|-----------|-------------|------------|--------------|----------|-------------|
| Blackpool     | 68.55    | 0.29    | 0.71      | 67.43       | 0.27       | 0.71         | 49.39    | 8662        |
| Narberth      | 75.12    | 0.21    | 0.54      | 73.81       | 0.19       | 0.56         | 61.09    | 8647        |
| Plymouth      | 76.77    | 0.54    | 0.57      | 75.8        | 0.52       | 0.55         | 45.59    | 8621        |
| Brighton      | 72.4     | 0.31    | 0.66      | 72.39       | 0.31       | 0.6          | 51.52    | 8653        |
| Lullington    |          |         |           |             |            |              |          |             |
| Heath         | 73.98    | 0.34    | 0.61      | 74.31       | 0.34       | 0.55         | 53.61    | 8603        |
| Newcastle     | 66.52    | 0.63    | 0.68      | 67.14       | 0.64       | 0.64         | 36.56    | 8411        |
| Phare         |          |         |           |             |            |              |          |             |
| d'Ailly       | 76.09    | 0.23    | 0.61      | 74.7        | 0.21       | 0.62         | 59.62    | 8700        |
| Houtem        | 64.51    | 0.28    | 0.75      | 67.08       | 0.31       | 0.72         | 47.15    | 7829        |
| Gent          | 50.48    | 0.42    | 0.72      | 61.01       | 0.55       | 0.71         | 32.78    | 7683        |
| Schoten       | 45.04    | 0.36    | 0.78      | 56.81       | 0.52       | 0.78         | 29.5     | 8328        |
| Den Haag      | 39.51    | 0.22    | 0.82      | 57.67       | 0.45       | 0.75         | 33.29    | 8657        |
| De Zilk       | 48.49    | 0.12    | 0.8       | 59.38       | 0.23       | 0.73         | 42.27    | 8615        |
| Wieringerwerf | 68.96    | 0.42    | 0.68      | 72.78       | 0.46       | 0.57         | 44.15    | 8504        |
| Ostfr.        |          |         |           |             |            |              |          |             |
| Inseln        | 72.08    | 0.2     | 0.7       | 72.72       | 0.2        | 0.6          | 55.72    | 8570        |
| Elbmündung    |          |         |           |             |            |              |          |             |
| g             | 67.33    | 0.28    | 0.72      | 69.55       | 0.3        | 0.65         | 47.54    | 8725        |
| Westerland    | 77.55    | 0.18    | 0.64      | 76.3        | 0.15       | 0.52         | 61.91    | 8561        |
| Ulborg        | 73.55    | 0.15    | 0.58      | 71.75       | 0.12       | 0.46         | 61.99    | 7664        |
| Århus         | 72.37    | 0.33    | 0.65      | 72.26       | 0.32       | 0.55         | 50.36    | 8323        |
| Råö           | 74.34    | 0.16    | 0.68      | 73.69       | 0.15       | 0.59         | 62.74    | 8647        |
| Copenhagen    |          |         |           |             |            |              |          |             |
| n             | 66.14    | 0.17    | 0.67      | 67.03       | 0.17       | 0.57         | 53.76    | 7973        |
| Zingst        | 72.69    | 0.21    | 0.73      | 72.47       | 0.2        | 0.64         | 57.1     | 8596        |
| Vilsandi      | 75.61    | 0.14    | 0.59      | 72.72       | 0.09       | 0.45         | 65.64    | 8504        |
| Utö           | 74.56    | 0.12    | 0.59      | 72.21       | 0.08       | 0.46         | 66.32    | 8672        |
| Õismäe        | 67.6     | 0.27    | 0.62      | 68.15       | 0.27       | 0.52         | 51.05    | 8482        |
| Helsinki      |          |         |           |             |            |              |          |             |
| Kallio        | 58.39    | 0.26    | 0.61      | 58.41       | 0.25       | 0.54         | 44.94    | 8744        |
| Lahemaa       | 65.52    | 0.24    | 0.63      | 64.04       | 0.21       | 0.61         | 50.24    | 8735        |
| Virolahti     | 67.24    | 0.33    | 0.53      | 66.2        | 0.31       | 0.5          | 47.51    | 8622        |
| Pyykösjärvi   | 51.92    | 0.16    | 0.61      | 51.19       | 0.14       | 0.61         | 43.39    | 8744        |

**Table S5.** Comparison of modeled PM<sub>2.5</sub> concentrations in  $\mu\text{g} \cdot \text{m}^{-3}$  with measurements in Europe.

| Station   | Mean-base | NMB-base | Corr.base | Mean-noships | NMB-noships | Corr.noships | Mean-meas | No. samples |
|-----------|-----------|----------|-----------|--------------|-------------|--------------|-----------|-------------|
| Blackpool | 8.17      | 0.32     | 0.36      | 7.74         | 0.26        | 0.34         | 5.78      | 7508        |

|                      |       |       |      |       |       |      |       |      |
|----------------------|-------|-------|------|-------|-------|------|-------|------|
| Plymouth             | 8.52  | 0.01  | 0.29 | 7.79  | -0.07 | 0.25 | 9.33  | 6502 |
| Newcastle            | 7.96  | 0.03  | 0.32 | 7.58  | -0.02 | 0.29 | 7.8   | 5540 |
| Houtem               | 9.65  | 0.19  | 0.46 | 8.66  | 0.09  | 0.43 | 8.12  | 8632 |
| Gent                 | 10.57 | -0.04 | 0.5  | 10.57 | -0.04 | 0.5  | 11.15 | 8575 |
| Schoten              | 10.87 | -0.02 | 0.53 | 9.93  | -0.09 | 0.53 | 10.79 | 8701 |
| De Zilk              | 9.73  | 0.24  | 0.45 | 8.7   | 0.13  | 0.44 | 6.61  | 7868 |
| Wier-<br>ingerwerf   | 8.93  | 0.25  | 0.44 | 7.94  | 0.13  | 0.4  | 6.04  | 8140 |
| Utö                  | 4     | 0.11  | 0.28 | 3.71  | 0.04  | 0.28 | 3.45  | 8197 |
| Helsinki Kal-<br>lio | 4.84  | 0.2   | 0.29 | 4.55  | 0.13  | 0.29 | 4.22  | 8366 |
| Virolahti            | 3.87  | 0.13  | 0.21 | 3.66  | 0.08  | 0.2  | 4.19  | 8595 |

**Table S6.** Comparison of modeled NO<sub>2</sub> concentrations in  $\mu\text{g}\cdot\text{m}^{-3}$  with measurements in China.

| Station            | Mean-<br>base | NMB-<br>base | Corr.bas<br>e | Mean-<br>noships | NMB-<br>noships | Corr.noshi<br>ps | Mean-<br>meas | No.<br>samples |
|--------------------|---------------|--------------|---------------|------------------|-----------------|------------------|---------------|----------------|
| Dalian             | 53.68         | 1.03         | 0.33          | 45.6             | 0.68            | 0.42             | 29.53         | 8576           |
| Huludao            | 16.78         | -0.38        | 0.64          | 16.37            | -0.40           | 0.64             | 29.73         | 8576           |
| Qinhuangdao        | 29.04         | -0.14        | 0.6           | 26.27            | -0.22           | 0.62             | 38.01         | 8577           |
| Tianjin            | 56.95         | 0.59         | 0.64          | 56.19            | 0.58            | 0.64             | 33.53         | 8575           |
| Lianyungang        | 15.05         | -0.14        | 0.66          | 13.95            | -0.18           | 0.65             | 24.31         | 8576           |
| Yancheng           | 18.57         | 0.17         | 0.61          | 17.3             | 0.1             | 0.6              | 19.6          | 8576           |
| Nantong            | 36.79         | 0.35         | 0.6           | 31.98            | 0.13            | 0.6              | 30.45         | 8575           |
| Shanghai           | 59.11         | 0.54         | 0.53          | 49.11            | 0.3             | 0.6              | 39.27         | 8576           |
| Ningbo             | 44.97         | 0.34         | 0.57          | 36.53            | 0.11            | 0.58             | 37.27         | 8576           |
| Wenzhou            | 30.72         | -0.05        | 0.37          | 28.74            | -0.11           | 0.37             | 38.75         | 8576           |
| Fuzhou             | 23.77         | 0.04         | 0.34          | 22.86            | 0.01            | 0.34             | 28.91         | 8575           |
| Quanzhou           | 24.96         | 0.29         | 0.4           | 23.66            | 0.22            | 0.39             | 21.22         | 8577           |
| Shantou            | 15.01         | 0.05         | 0.48          | 12.55            | -0.09           | 0.5              | 16.98         | 8576           |
| Shenzhen           | 47.27         | 0.8          | 0.41          | 42.3             | 0.6             | 0.42             | 30.07         | 8576           |
| Guangzhou          | 58.01         | 0.6          | 0.49          | 58.01            | 0.6             | 0.49             | 41.38         | 8576           |
| Zhongshan          | 20.33         | 0.05         | 0.35          | 15.91            | -0.17           | 0.35             | 23.39         | 8576           |
| Zhuhai             | 14.25         | -0.25        | 0.48          | 7.71             | -0.57           | 0.45             | 23.3          | 8576           |
| Haikou             | 6.92          | -0.37        | 0.35          | 6.18             | -0.45           | 0.38             | 11.34         | 8576           |
| Beihai             | 5.38          | -0.51        | 0.27          | 4.83             | -0.57           | 0.32             | 12.1          | 8576           |
| Fangcheng-<br>gang | 5.04          | -0.42        | 0.42          | 4.07             | -0.52           | 0.43             | 10.45         | 8578           |

**Table S7.** Comparison of modeled SO<sub>2</sub> concentrations in  $\mu\text{g}\cdot\text{m}^{-3}$  with measurements in China.

| Station     | Mean-<br>base | NMB-<br>base | Corr.bas<br>e | Mean-<br>noships | NMB-<br>noships | Corr.noshi<br>ps | Mean-<br>meas | No.<br>samples |
|-------------|---------------|--------------|---------------|------------------|-----------------|------------------|---------------|----------------|
| Dalian      | 24.74         | 0.16         | 0.19          | 21.76            | -0.07           | 0.27             | 19.59         | 8576           |
| Huludao     | 7.85          | -0.78        | 0.51          | 7.69             | -0.78           | 0.51             | 33.1          | 8576           |
| Qinhuangdao | 14.51         | -0.45        | 0.61          | 13.28            | -0.50           | 0.64             | 28.64         | 8577           |
| Tianjin     | 29.83         | 0.38         | 0.66          | 29.44            | 0.37            | 0.66             | 19            | 8575           |
| Lianyungang | 4.75          | -0.60        | 0.63          | 4.23             | -0.62           | 0.63             | 22.07         | 8576           |
| Yancheng    | 3.75          | -0.48        | 0.55          | 3.21             | -0.52           | 0.55             | 15.53         | 8576           |
| Nantong     | 11.84         | -0.40        | 0.54          | 9.97             | -0.52           | 0.52             | 23.5          | 8575           |
| Shanghai    | 27.09         | 1.08         | 0.5           | 23.16            | 0.77            | 0.52             | 14.7          | 8576           |
| Ningbo      | 16.06         | 0.34         | 0.47          | 12.32            | 0.01            | 0.47             | 14.36         | 8576           |
| Wenzhou     | 9.05          | -0.24        | 0.22          | 8.15             | -0.31           | 0.21             | 11.96         | 8576           |
| Fuzhou      | 6.19          | 0.22         | 0.17          | 5.79             | 0.14            | 0.17             | 5.78          | 8575           |
| Quanzhou    | 9.87          | 0.12         | 0.23          | 9.26             | 0.07            | 0.23             | 8.6           | 8577           |
| Shantou     | 6.05          | -0.43        | 0.5           | 5.22             | -0.51           | 0.5              | 11.64         | 8576           |
| Shenzhen    | 15.55         | 1.18         | 0.24          | 14.43            | 1.03            | 0.24             | 7.93          | 8576           |

|                |       |       |      |       |       |      |       |      |
|----------------|-------|-------|------|-------|-------|------|-------|------|
| Guangzhou      | 20.86 | 1.02  | 0.3  | 20.86 | 1.02  | 0.3  | 10.96 | 8576 |
| Zhongshan      | 7.03  | -0.10 | 0.24 | 5.73  | -0.26 | 0.26 | 9.99  | 8576 |
| Zhuhai         | 5.03  | -0.12 | 0.64 | 3.33  | -0.38 | 0.64 | 7.03  | 8576 |
| Haikou         | 3     | -0.31 | 0.41 | 2.75  | -0.38 | 0.41 | 4.84  | 8576 |
| Beihai         | 4.93  | -0.28 | 0.32 | 4.67  | -0.33 | 0.31 | 7.9   | 8576 |
| Fangcheng-gang | 4.48  | 0.12  | 0.06 | 4.05  | 0.03  | 0.07 | 4.89  | 8578 |

**Table S8.** Comparison of modeled O<sub>3</sub> 8-hour average concentrations in  $\mu\text{g} \cdot \text{m}^{-3}$  with measurements in China.

| Station        | Mean-base | NMB-base | Corr.bas<br>e | Mean-noships | NMB-noships | Corr.noshi<br>ps | Mean-meas | No.<br>samples |
|----------------|-----------|----------|---------------|--------------|-------------|------------------|-----------|----------------|
| Dalian         | 26.28     | -0.15    | 0.74          | 32.07        | -0.09       | 0.77             | 64.12     | 8648           |
| Huludao        | 52.85     | 0.5      | 0.79          | 53.57        | 0.46        | 0.8              | 48.38     | 8648           |
| Qinhuangdao    | 31.46     | 0.91     | 0.73          | 34.27        | 0.94        | 0.73             | 30.5      | 8648           |
| Tianjin        | 4.32      | 0.36     | 0.81          | 4.43         | 0.35        | 0.81             | 29.99     | 8648           |
| Lianyungang    | 57.19     | 0.38     | 0.74          | 58.22        | 0.33        | 0.74             | 60.35     | 8648           |
| Yancheng       | 59.14     | 0.14     | 0.7           | 60.01        | 0.1         | 0.7              | 72.76     | 8648           |
| Nantong        | 37.06     | 0.12     | 0.7           | 45.14        | 0.14        | 0.69             | 62.88     | 8648           |
| Shanghai       | 21.57     | -0.05    | 0.67          | 29.85        | -0.02       | 0.68             | 60.07     | 8648           |
| Ningbo         | 36.73     | 0.21     | 0.67          | 44.06        | 0.22        | 0.65             | 50.95     | 8648           |
| Wenzhou        | 51.9      | 0.65     | 0.55          | 47.63        | 0.51        | 0.54             | 33.98     | 8647           |
| Fuzhou         | 70.8      | 0.85     | 0.49          | 62.36        | 0.69        | 0.51             | 40.27     | 8647           |
| Quanzhou       | 63.49     | 0.56     | 0.57          | 54.04        | 0.41        | 0.58             | 46.82     | 8647           |
| Shantou        | 78.48     | 0.35     | 0.61          | 71.36        | 0.23        | 0.6              | 61.95     | 8648           |
| Shenzhen       | 27.79     | 0.15     | 0.64          | 27.5         | 0.07        | 0.62             | 48.69     | 8648           |
| Guangzhou      | 22.08     | 0.53     | 0.67          | 22.73        | 0.48        | 0.67             | 26.21     | 8648           |
| Zhongshan      | 64.65     | 0.97     | 0.47          | 66.04        | 0.9         | 0.43             | 33.83     | 8648           |
| Zhuhai         | 79.18     | 0.64     | 0.62          | 81.63        | 0.62        | 0.61             | 51.72     | 8648           |
| Haikou         | 85.7      | 0.85     | 0.62          | 80.24        | 0.73        | 0.6              | 44.2      | 8648           |
| Beihai         | 92.03     | 0.41     | 0.3           | 85.43        | 0.3         | 0.3              | 65.84     | 8648           |
| Fangcheng-gang | 87.99     | 1.21     | 0.46          | 83.27        | 1.08        | 0.45             | 36.73     | 8648           |

**Table S9.** Comparison of modeled PM<sub>2.5</sub> concentrations in  $\mu\text{g} \cdot \text{m}^{-3}$  with measurements in China.

| Station     | Mean-base | NMB-base | Corr.bas<br>e | Mean-noships | NMB-noships | Corr.noshi<br>ps | Mean-meas | No.<br>samples |
|-------------|-----------|----------|---------------|--------------|-------------|------------------|-----------|----------------|
| Dalian      | 43.42     | 0.17     | 0.56          | 42.24        | 0.14        | 0.57             | 33.98     | 8576           |
| Huludao     | 31.79     | -0.16    | 0.67          | 31.44        | -0.17       | 0.67             | 40.38     | 8576           |
| Qinhuangdao | 38.45     | 0.15     | 0.69          | 37.75        | 0.13        | 0.69             | 30.11     | 8577           |
| Tianjin     | 59.93     | 0.19     | 0.64          | 59.46        | 0.19        | 0.64             | 50.52     | 8575           |
| Lianyungang | 42.26     | 0.1      | 0.61          | 41.19        | 0.08        | 0.61             | 39.82     | 8576           |
| Yancheng    | 41.12     | 0.18     | 0.59          | 39.77        | 0.15        | 0.59             | 35.52     | 8576           |
| Nantong     | 42.19     | -0.04    | 0.53          | 40.75        | -0.06       | 0.52             | 45.28     | 8575           |
| Shanghai    | 41.51     | 0.02     | 0.5           | 39.76        | -0.02       | 0.49             | 41.1      | 8576           |
| Ningbo      | 37.51     | 0.07     | 0.43          | 35.83        | 0.03        | 0.42             | 35.3      | 8576           |
| Wenzhou     | 36.03     | -0.01    | 0.31          | 34.48        | -0.04       | 0.3              | 37.3      | 8576           |
| Fuzhou      | 34.67     | 0.37     | 0.28          | 33.44        | 0.33        | 0.27             | 24.41     | 8575           |
| Quanzhou    | 44.64     | 0.86     | 0.32          | 43.34        | 0.81        | 0.32             | 23.66     | 8577           |
| Shantou     | 42.11     | 0.46     | 0.25          | 40.73        | 0.42        | 0.23             | 28.22     | 8576           |
| Shenzhen    | 48.7      | 0.79     | 0.17          | 47.48        | 0.75        | 0.16             | 25.08     | 8576           |
| Guangzhou   | 52.25     | 0.51     | 0.3           | 52.25        | 0.51        | 0.3              | 32.91     | 8576           |
| Zhongshan   | 48.02     | 0.59     | 0.12          | 46.64        | 0.55        | 0.1              | 26.3      | 8576           |
| Zhuhai      | 45.85     | 0.66     | 0.2           | 44.41        | 0.61        | 0.17             | 23.98     | 8576           |
| Haikou      | 37.56     | 1.1      | 0.47          | 37.05        | 1.08        | 0.46             | 17.73     | 8576           |

|                |       |      |      |       |      |      |       |      |
|----------------|-------|------|------|-------|------|------|-------|------|
| Beihai         | 42.38 | 0.66 | 0.38 | 41.59 | 0.63 | 0.36 | 19.2  | 8435 |
| Fangcheng-gang | 41.99 | 0.58 | 0.3  | 41.27 | 0.55 | 0.28 | 24.14 | 8578 |

### 3. Pollutant concentration patterns 14

The following sections contain figures of seasonally averaged, modeled pollutant concentrations in the ground layer for the SC12NSBS domain in Europe and the CNC12 domain in China in 2015. These include the “base” case, modeled with all emission sources and for ships-only, determined by the zero-out method. Furthermore, the share of shipping on total concentrations is shown. Averages were calculated for the winter months: December, January, February; the spring months: March, April, May; the summer months: June, July, August; the autumn months: September, October, November. These are shown in that order from left to right.

#### 3.1. NO<sub>2</sub>

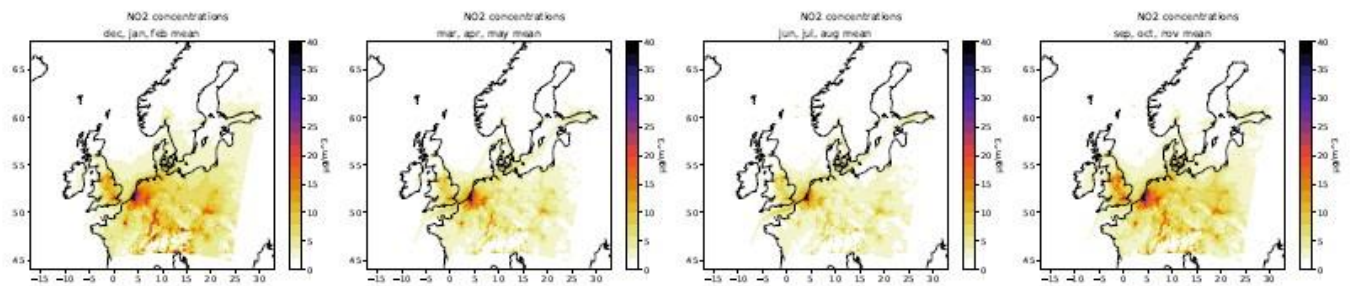

**Figure S1.** Seasonally averaged, modeled NO<sub>2</sub> concentrations in the ground layer from all emission sources in Europe.

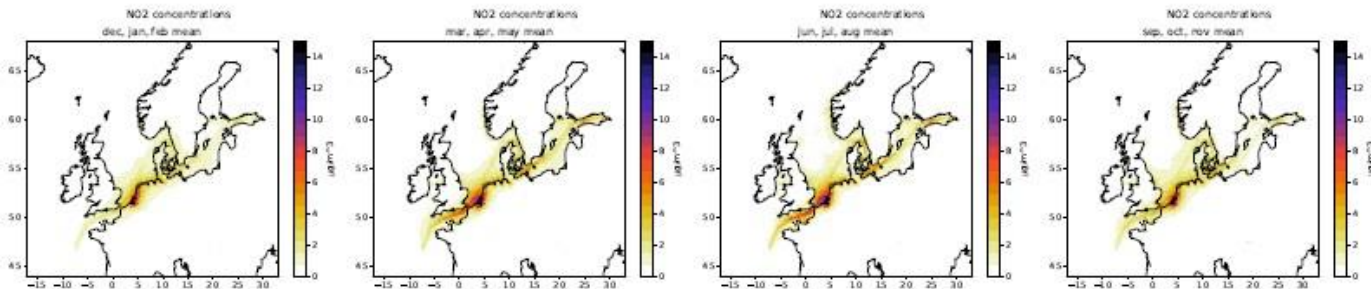

**Figure S2.** Seasonally averaged, modeled NO<sub>2</sub> concentrations in the ground layer from ships in Europe.

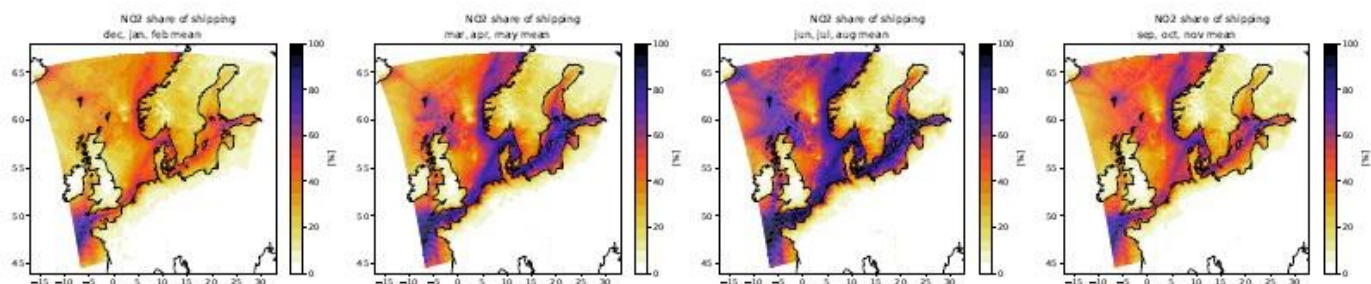

**Figure S3.** Seasonally averaged, modeled percentage share of ships on NO<sub>2</sub> concentrations in the ground layer in Europe.



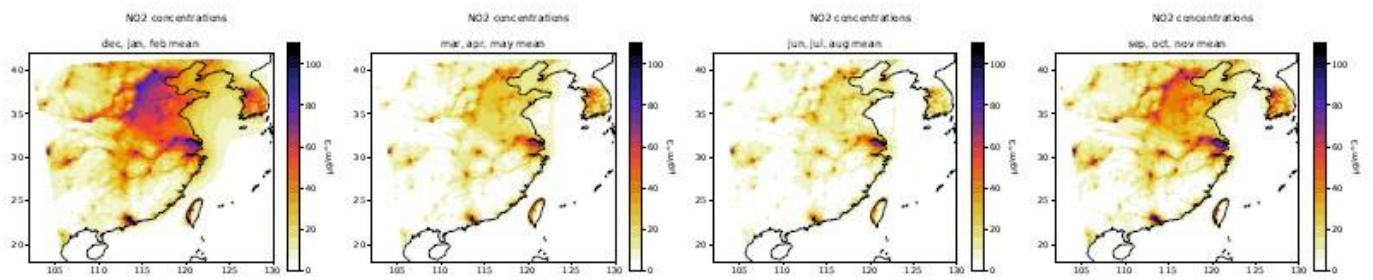

**Figure S4.** Seasonally averaged, modeled NO<sub>2</sub> concentrations in the ground layer from all sources in China.

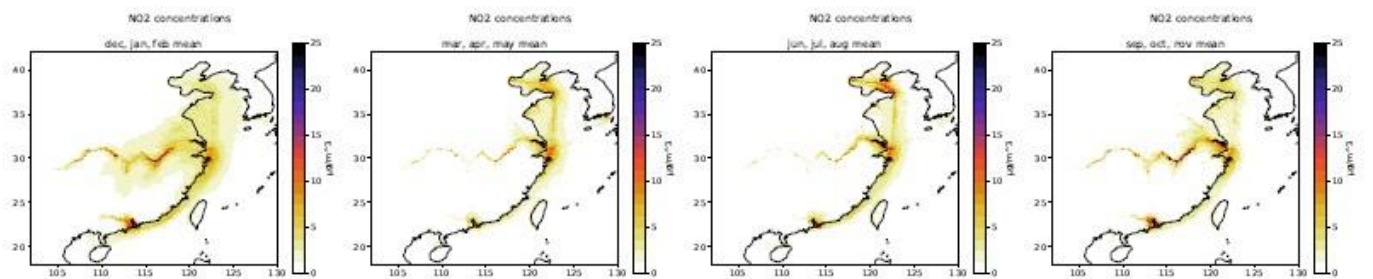

**Figure S5.** Seasonally averaged, modeled NO<sub>2</sub> concentrations in the ground layer from ships in China.

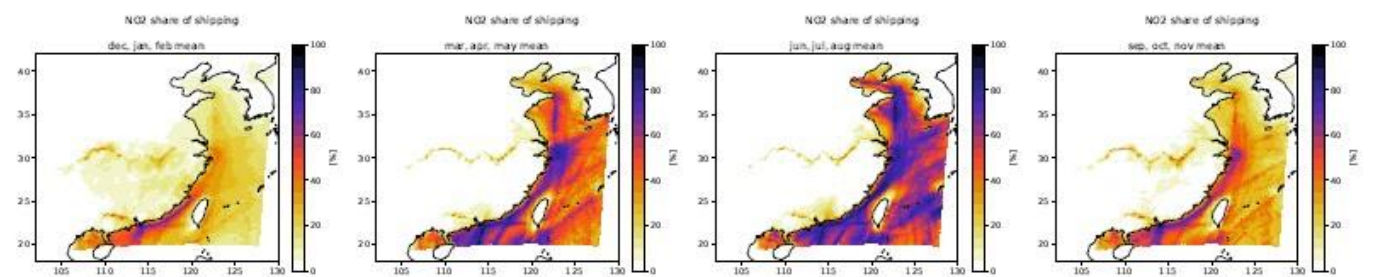

**Figure S6.** Seasonally averaged, modeled percentage share of ships on NO<sub>2</sub> concentrations in the ground layer in China.

### 3.2. SO<sub>2</sub>

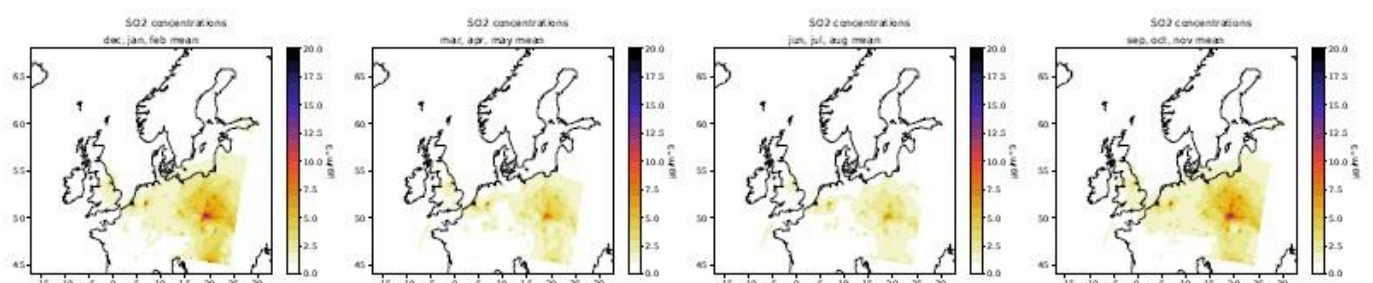

**Figure S7.** Seasonally averaged, modeled SO<sub>2</sub> concentrations in the ground layer from all sources in Europe.

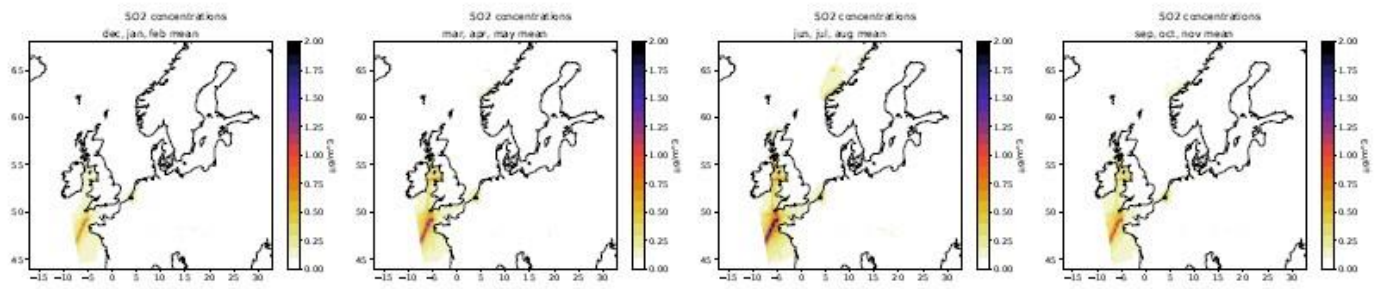

**Figure S8.** Seasonally averaged, modeled SO<sub>2</sub> concentrations in the ground layer from ships in Europe.

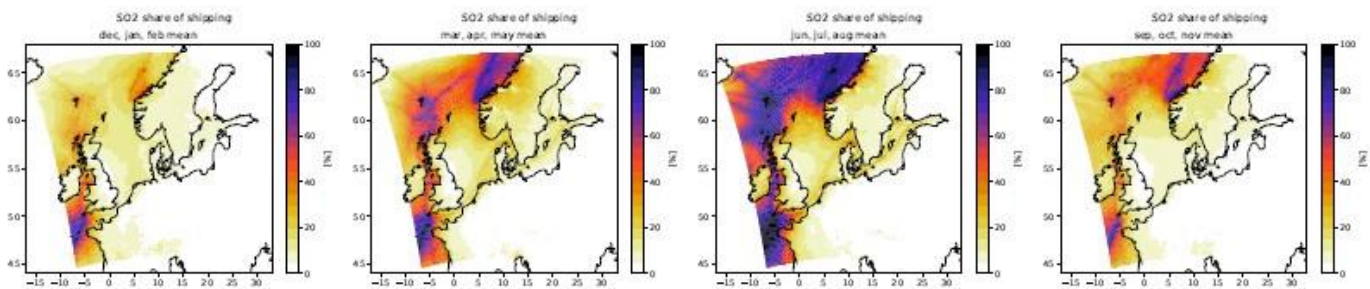

**Figure S9.** Seasonally averaged, modeled percentage share of ships on SO<sub>2</sub> concentrations in the ground layer in Europe.

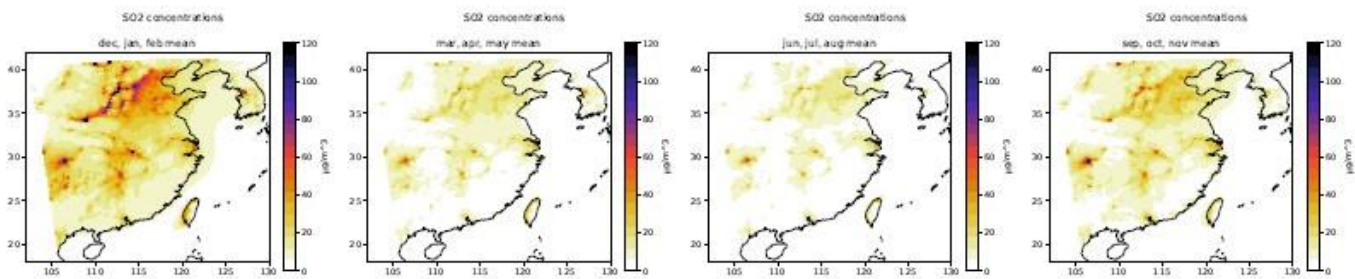

**Figure S10.** Seasonally averaged, modeled SO<sub>2</sub> concentrations in the ground layer from all sources in China.

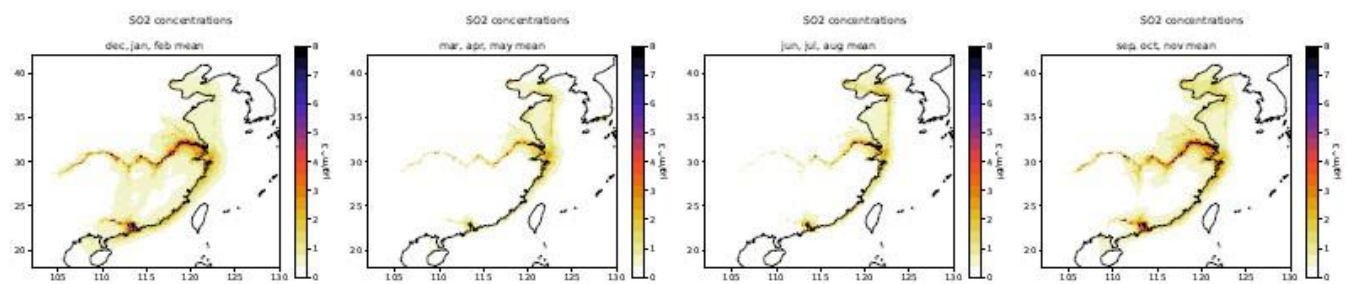

**Figure S11.** Seasonally averaged, modeled SO<sub>2</sub> concentrations in the ground layer from ships in China.



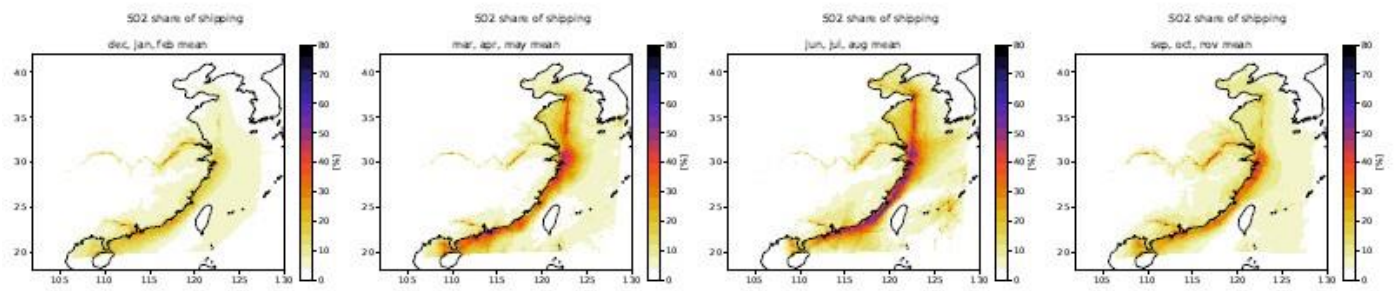

**Figure S12.** Seasonally averaged, modeled percentage share of ships on SO<sub>2</sub> concentrations in the ground layer in China.

### 3.3. Ozone

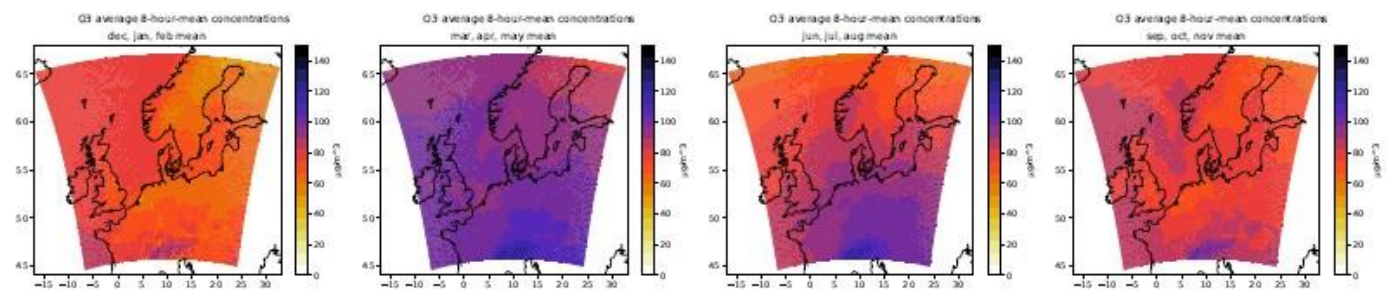

**Figure S13.** Seasonally averaged, modeled O<sub>3</sub> concentrations in the ground layer from all sources in Europe.

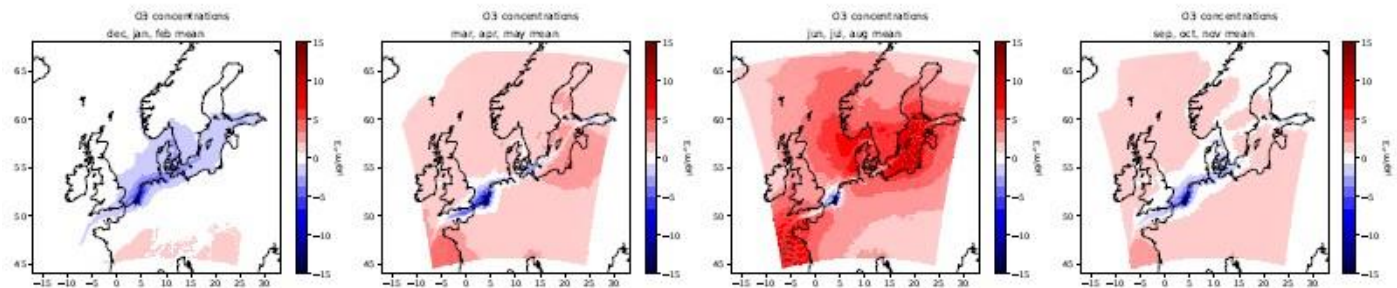

**Figure S14.** Seasonally averaged, modeled O<sub>3</sub> concentrations in the ground layer from ships in Europe.

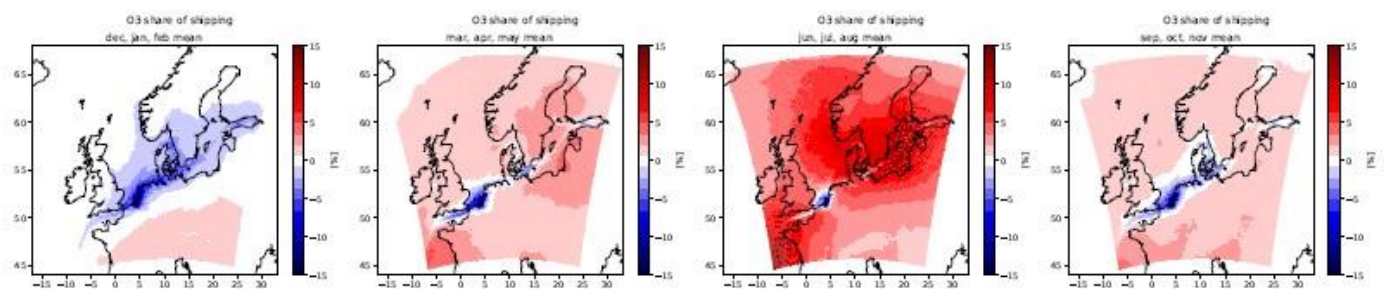

**Figure S15.** Seasonally averaged, modeled percentage share of ships on O<sub>3</sub> concentrations in the ground layer in Europe.

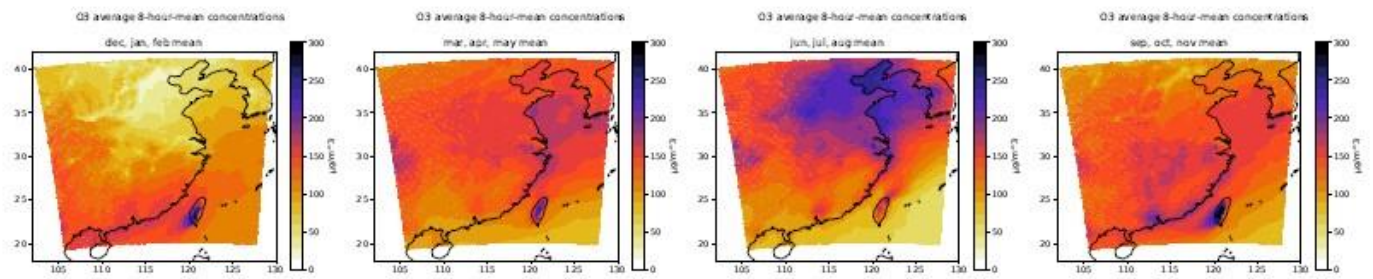

**Figure S16.** Seasonally averaged, modeled O<sub>3</sub> concentrations in the ground layer from all sources in China.

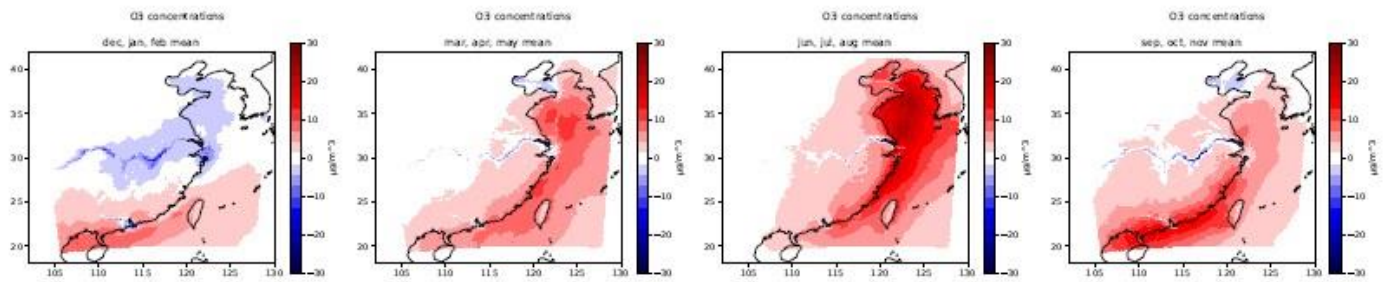

**Figure S17.** Seasonally averaged, modeled O<sub>3</sub> concentrations in the ground layer from ships in China.

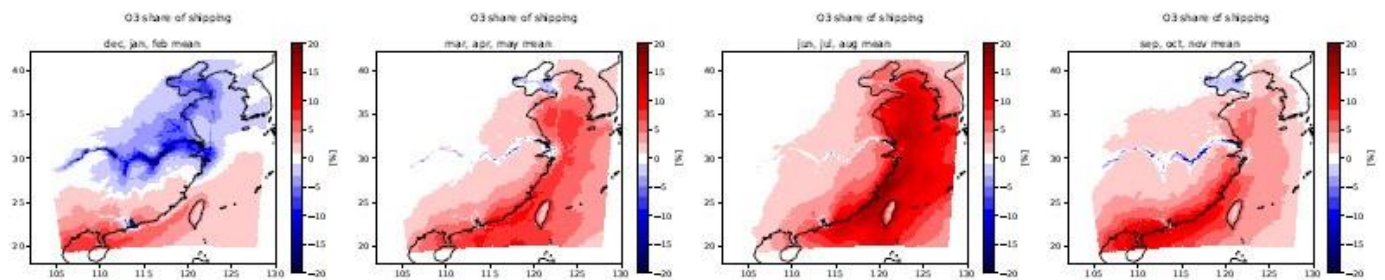

**Figure S18.** Seasonally averaged, modeled percentage share of ships on O<sub>3</sub> concentrations in the ground layer in China.

### 3.4. PM<sub>2.5</sub>

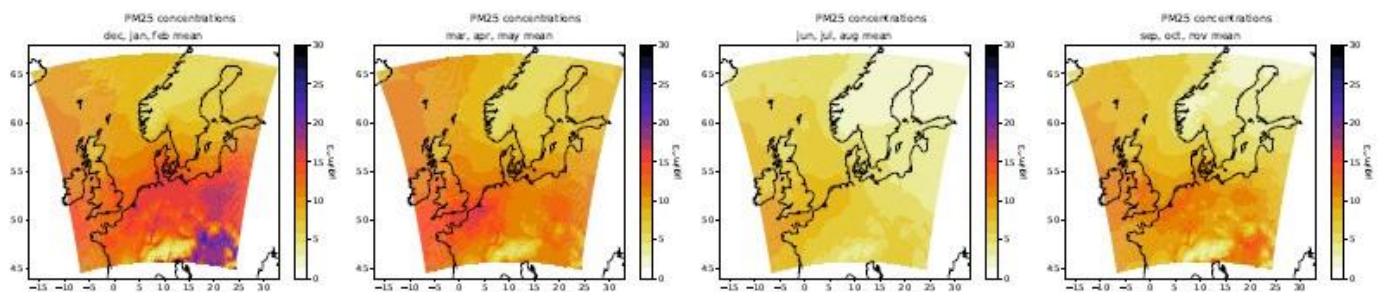

**Figure S19.** Seasonally averaged PM<sub>2.5</sub> concentrations in the ground layer from all sources in Europe.



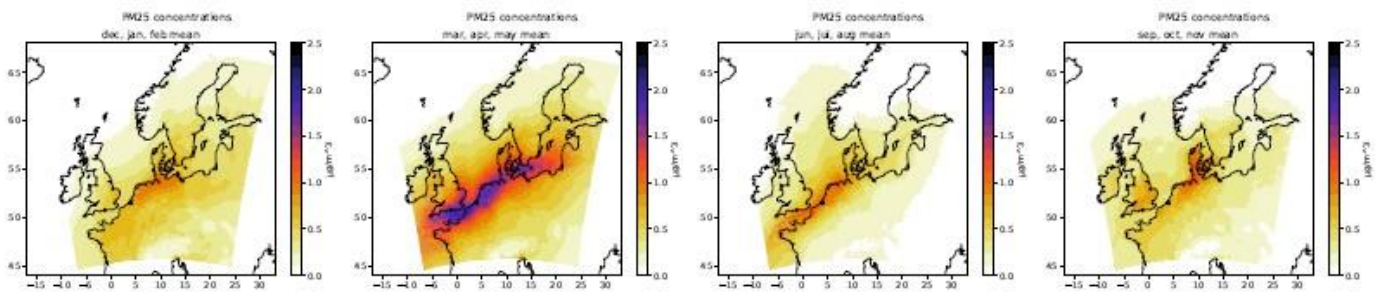

**Figure S20.** Seasonally averaged, modeled PM<sub>2.5</sub> concentrations in the ground layer from ships in Europe.

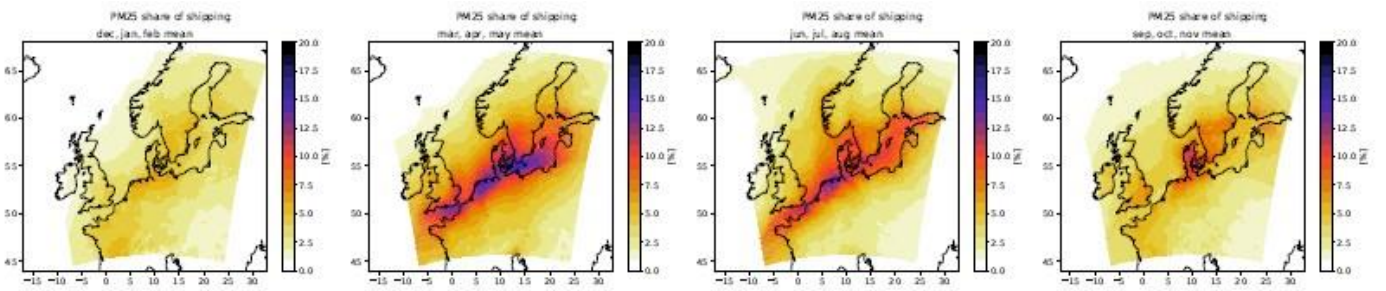

**Figure S21.** Seasonally averaged, modeled percentage share of ships on PM<sub>2.5</sub> concentrations in the ground layer in Europe.

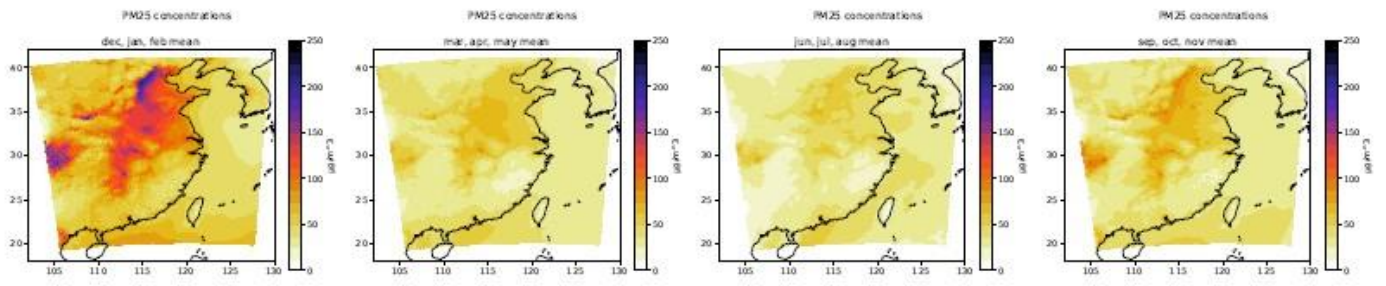

**Figure S22.** Seasonally averaged, modeled PM<sub>2.5</sub> concentrations in the ground layer from all sources in China.

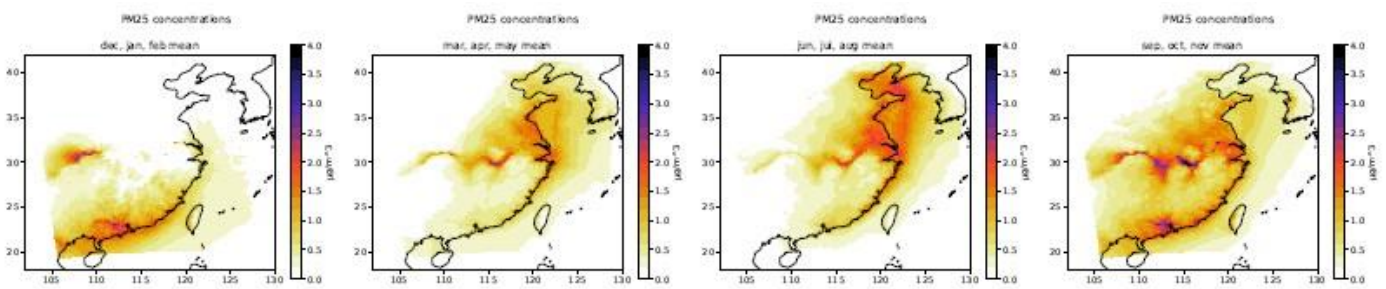

**Figure S23.** Seasonally averaged, modeled PM<sub>2.5</sub> concentrations in the ground layer from ships in China.

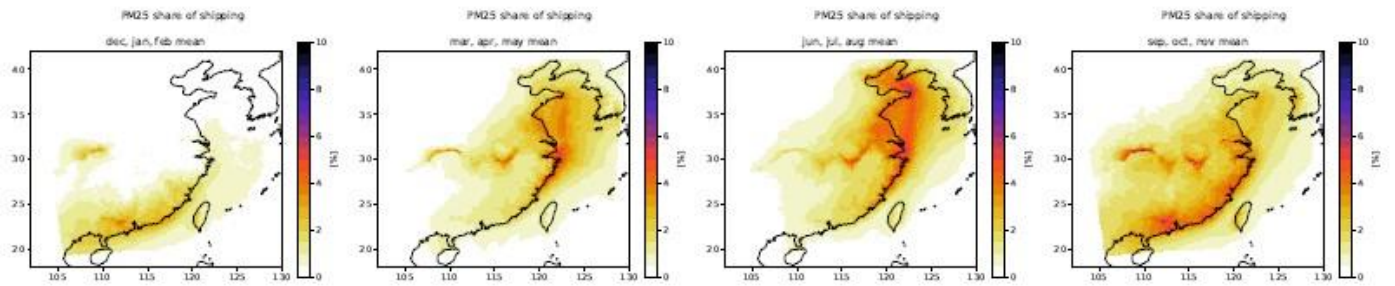

**Figure S24.** Seasonally averaged, modeled percentage share of ships on PM<sub>2.5</sub> concentrations in the ground layer in China.

### 3.5. NH<sub>4</sub>

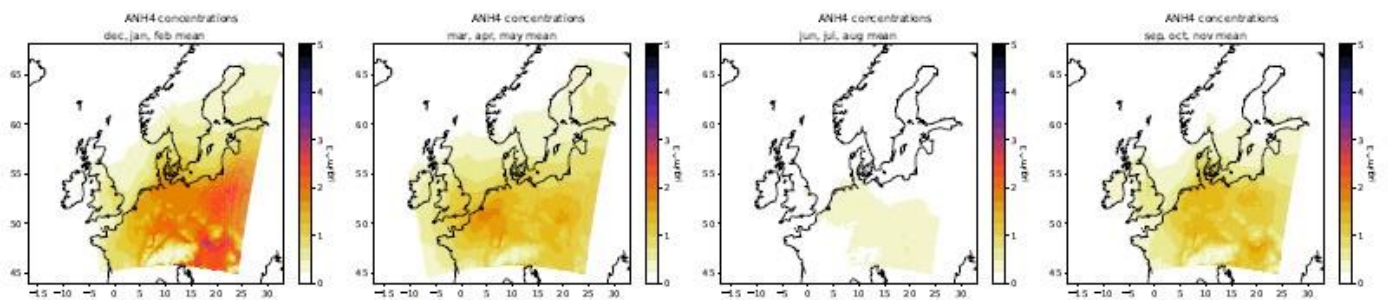

**Figure S25.** Seasonally averaged, modeled NH<sub>4</sub> concentrations in the ground layer from all sources in Europe.

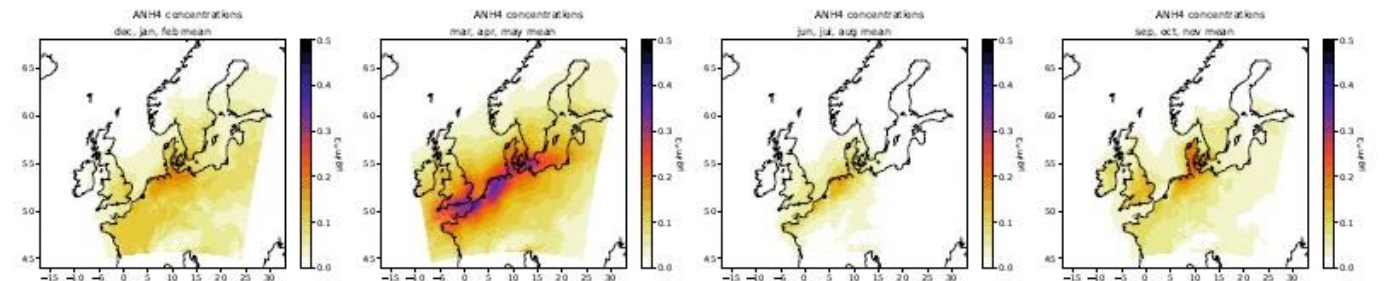

**Figure S26.** Seasonally averaged, modeled NH<sub>4</sub> concentrations in the ground layer from ships in Europe.

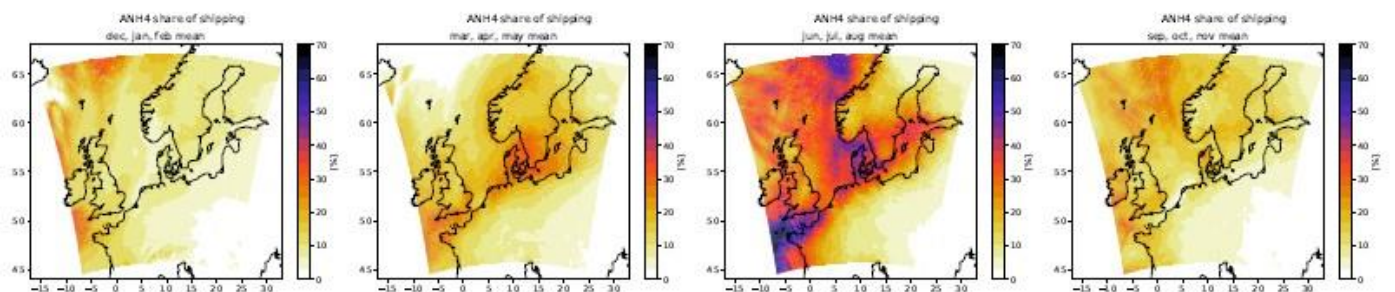

**Figure S27.** Seasonally averaged, modeled percentage share of ships on NH<sub>4</sub> concentrations in the ground layer in Europe.



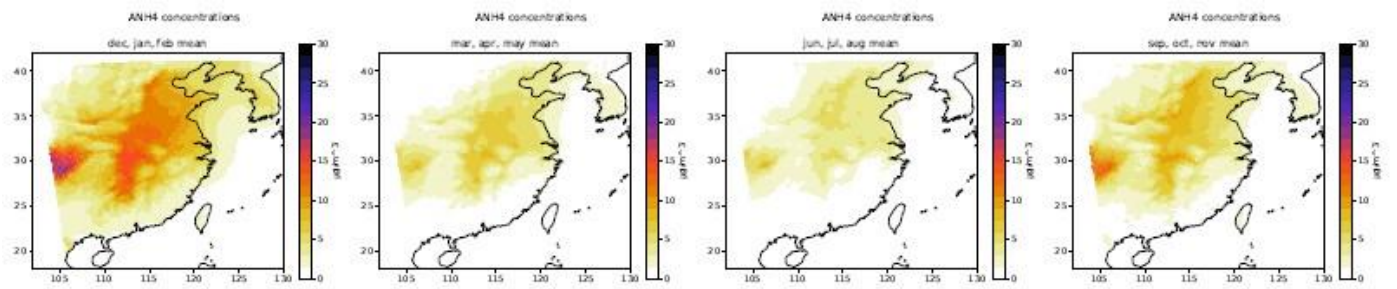

**Figure S28.** Seasonally averaged, modeled  $\text{NH}_4$  concentrations in the ground layer from all sources in China.

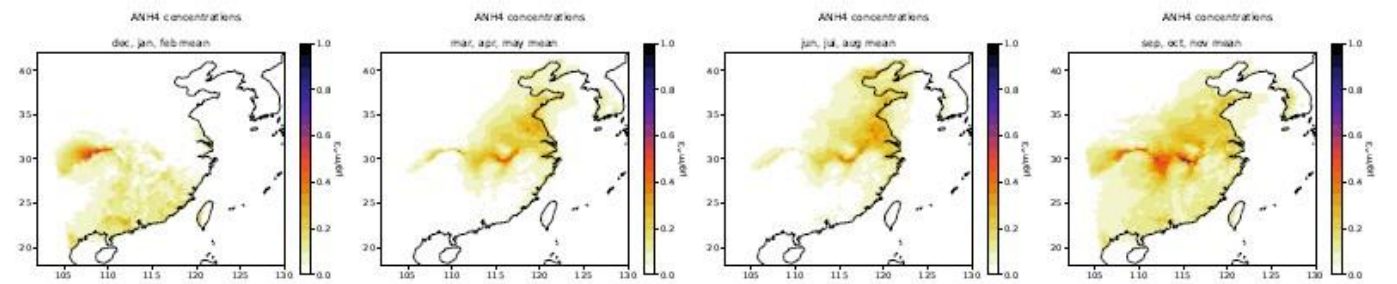

**Figure S29.** Seasonally averaged, modeled  $\text{NH}_4$  concentrations in the ground layer from ships in China.

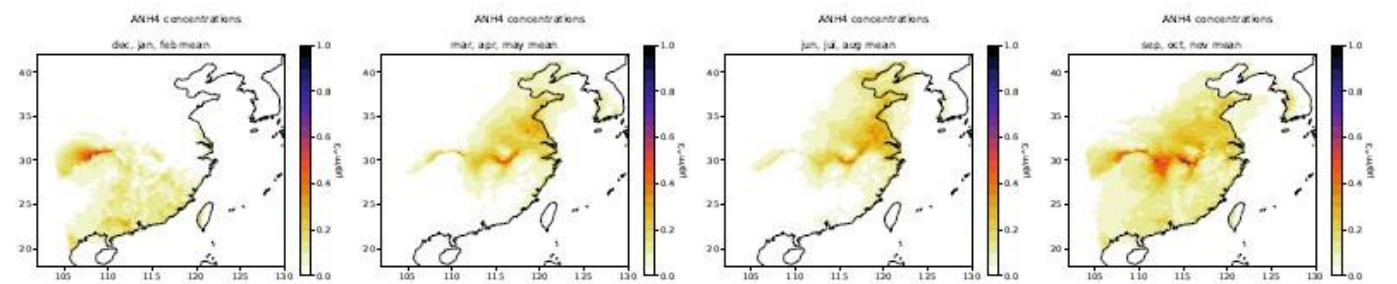

**Figure S30.** Seasonally averaged, modeled percentage share of ships on  $\text{NH}_4$  concentrations in the ground layer in China.

### 3.6. $\text{NH}_3$ emissions

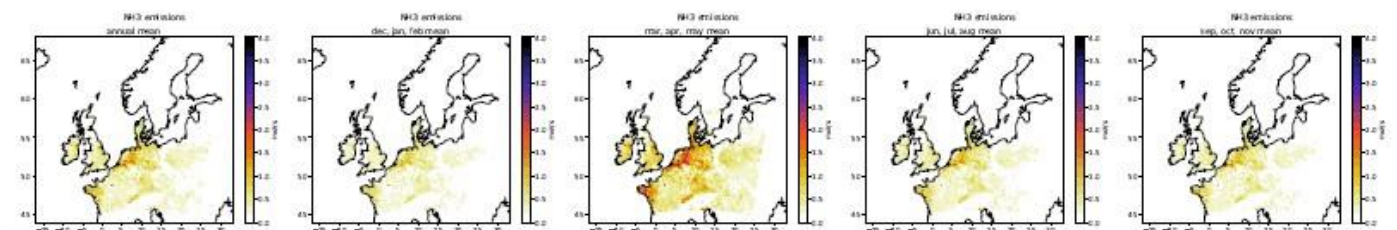

**Figure S31.** Seasonally averaged, modeled  $\text{NH}_3$  emissions in the ground layer in the Europe.

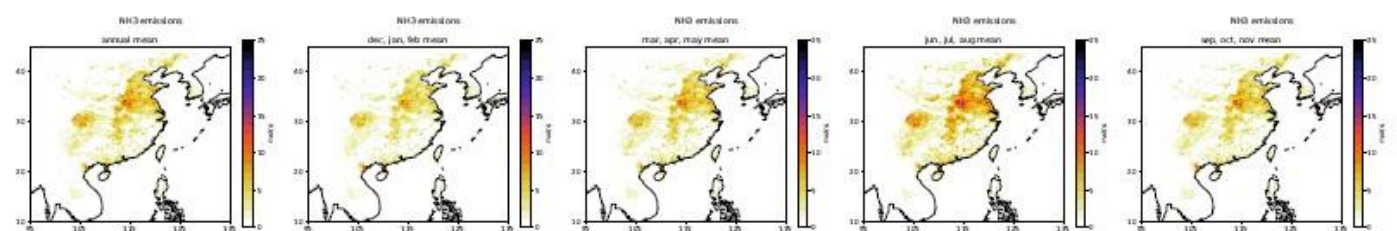



**Figure S32.** Seasonally averaged, modeled  $\text{NH}_3$  emissions in the ground layer in China.

### 3.7. $\text{NO}_3$

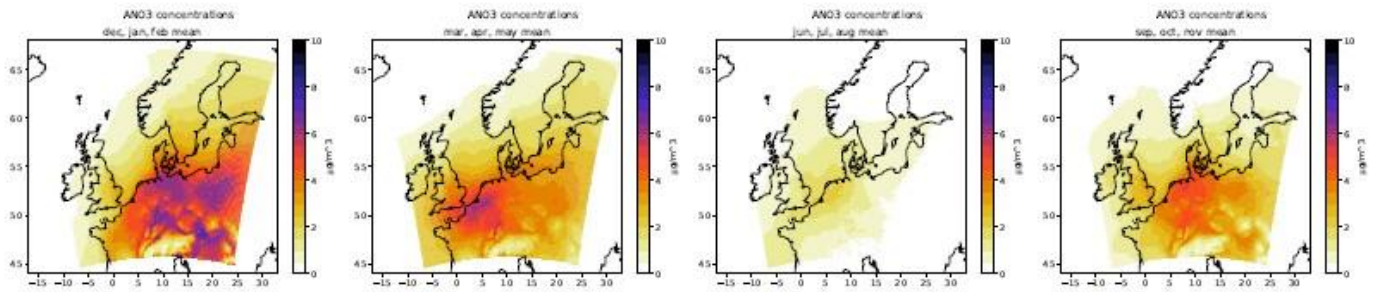

**Figure S33.** Seasonally averaged, modeled  $\text{NO}_3$  concentrations in the ground layer from all sources in Europe.

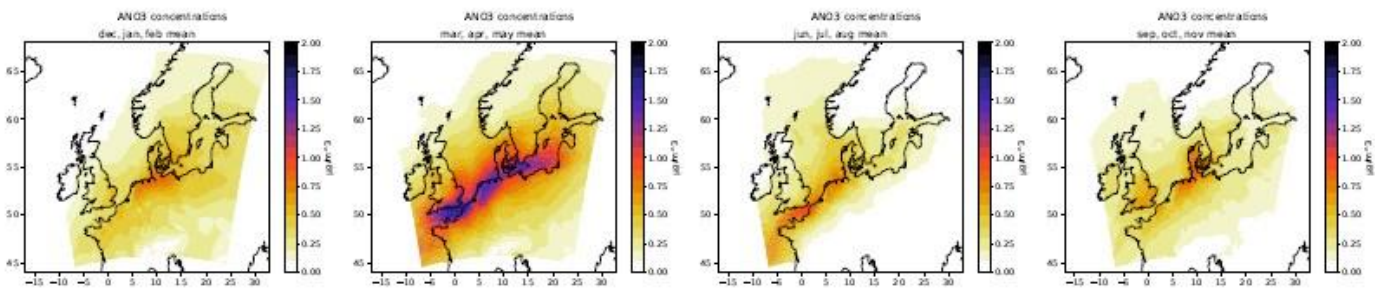

**Figure S34.** Seasonally averaged, modeled  $\text{NO}_3$  concentrations in the ground layer from ships in Europe.

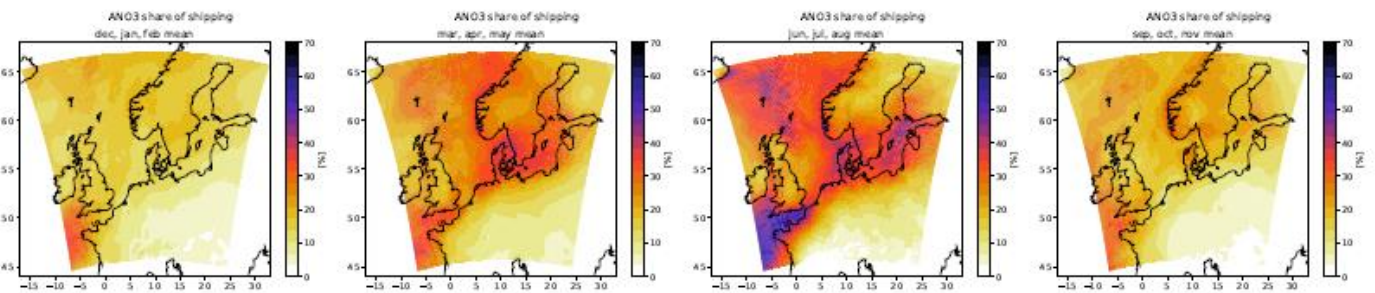

**Figure S35.** Seasonally averaged, modeled percentage share of ships on  $\text{NO}_3$  concentrations in the ground layer in Europe.

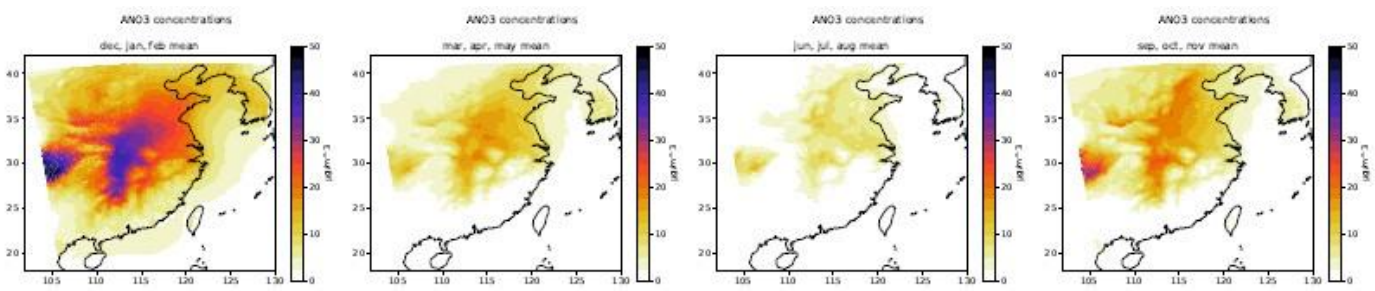

**Figure S36.** Seasonally averaged, modeled  $\text{NO}_3$  concentrations in the ground layer from all sources in China.

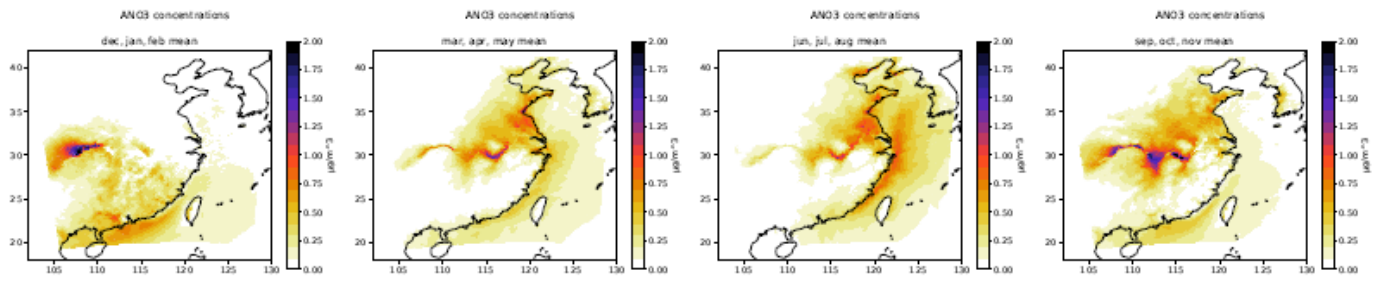

**Figure S37.** Seasonally averaged, modeled NO<sub>3</sub> concentrations in the ground layer from ships in China.

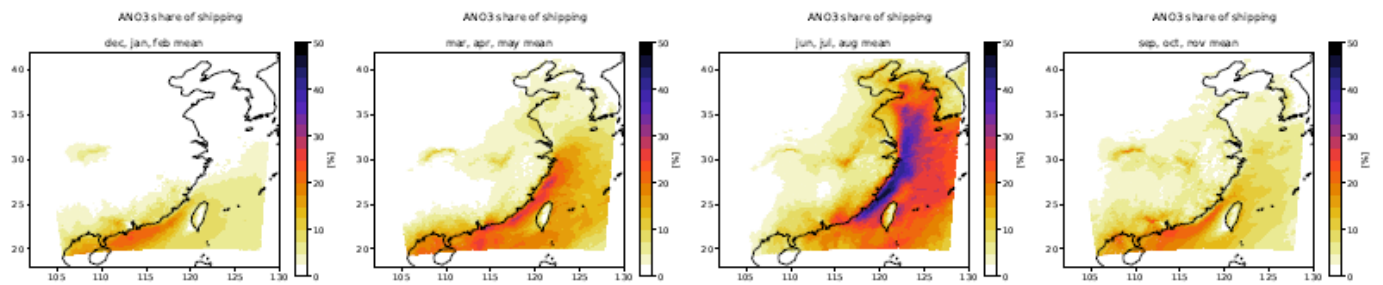

**Figure S38.** Seasonally averaged, modeled percentage share of ships on NO<sub>3</sub> concentrations in the ground layer in China.

### 3.8. SO<sub>4</sub>

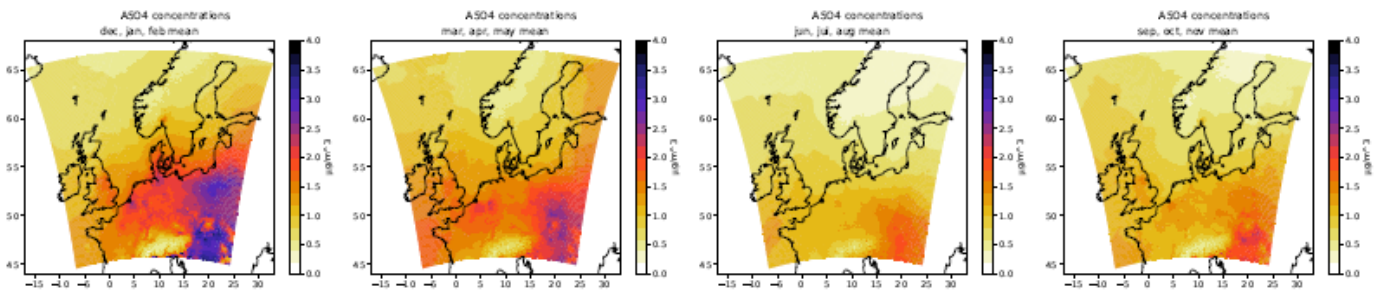

**Figure S39.** Seasonally averaged, modeled SO<sub>4</sub> concentrations in the ground layer from all sources in Europe.

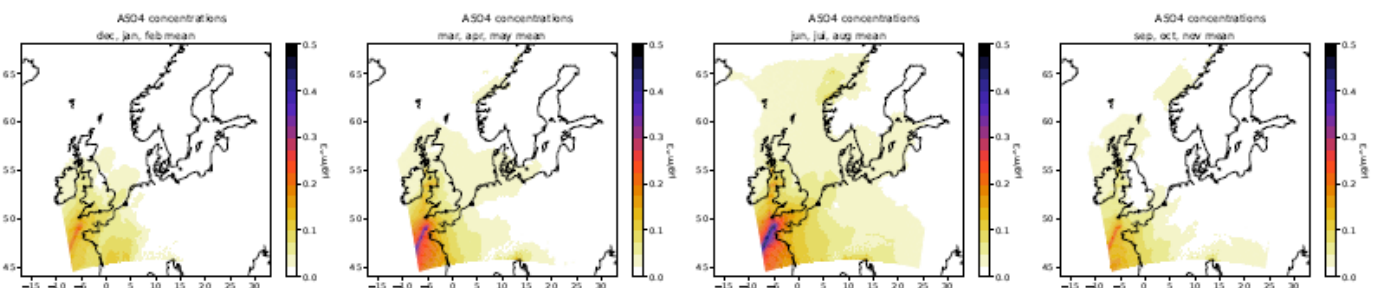

**Figure S40.** Seasonally averaged, modeled SO<sub>4</sub> concentrations in the ground layer from ships in Europe.

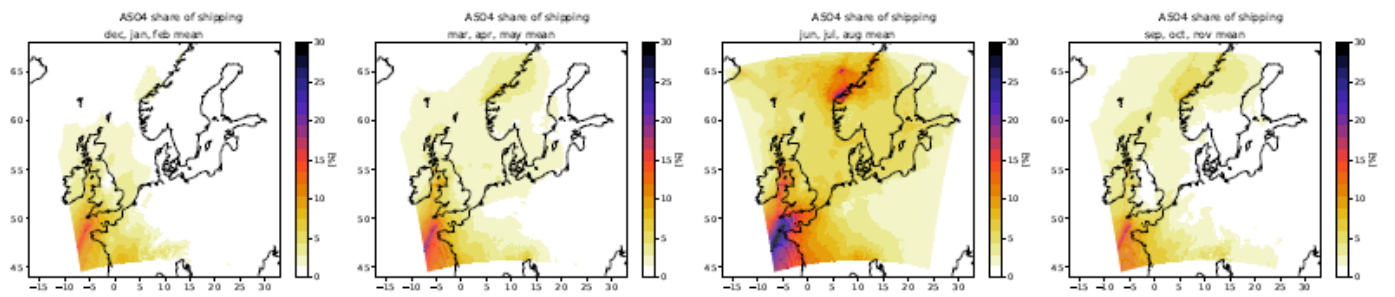

**Figure S41.** Seasonally averaged, modeled percentage share of ships on SO<sub>4</sub> concentrations in the ground layer in Europe.

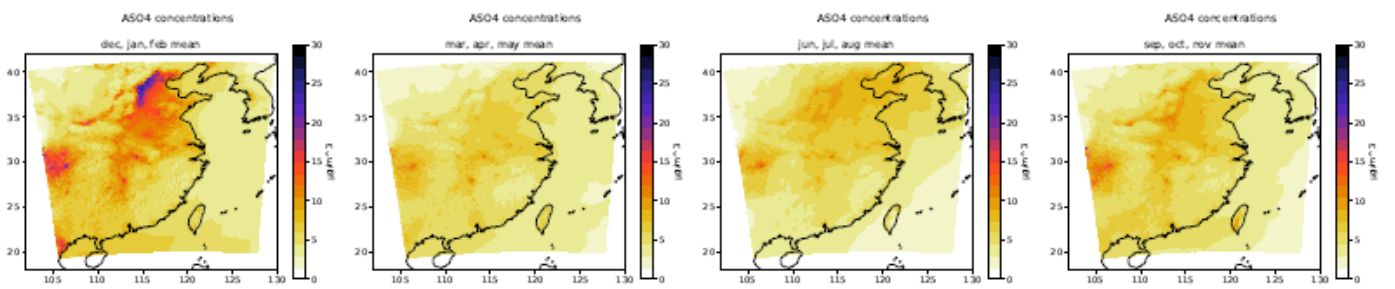

**Figure S42.** Seasonally averaged, modeled SO<sub>4</sub> concentrations in the ground layer from all sources in China.

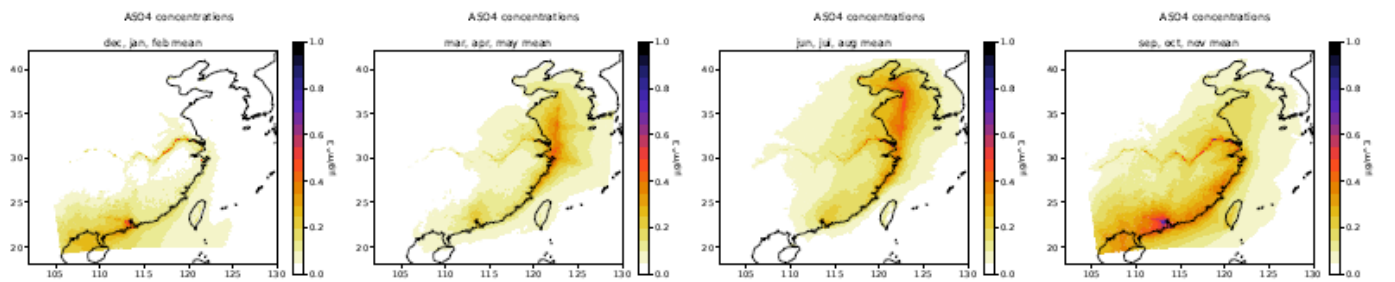

**Figure S43.** Seasonally averaged, modeled SO<sub>4</sub> concentrations in the ground layer from ships in China.

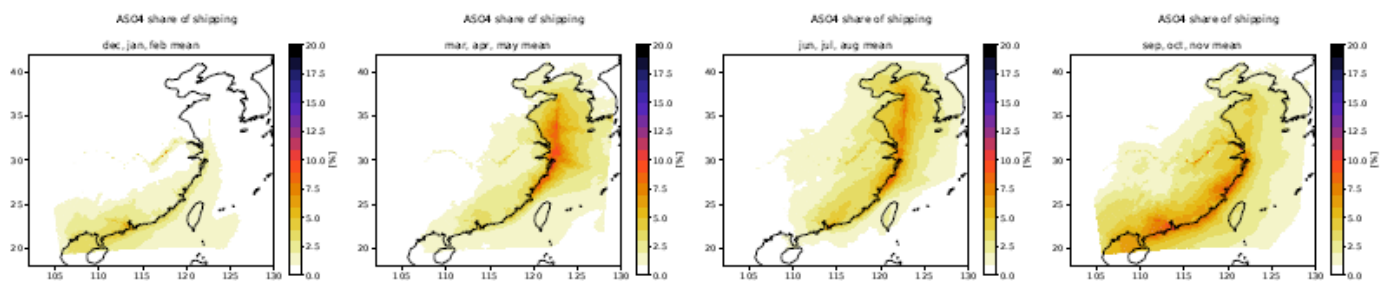

**Figure S44.** Seasonally averaged, modeled percentage share of ships on SO<sub>4</sub> concentrations in the ground layer in China.
